# Supplementary material for: MicroRNA in combination with HER2-targeting drugs reduces breast cancer cell viability in vitro
Source: PubMed Central journal article supplement (PMC8149698; doi:10.1038/s41598-021-90385-2), 2021-05-25

# MicroRNA in combination with HER2-targeting drugs reduces breast cancer cell viability *in vitro*

Lisa Svartdal Normann<sup>1,2,3</sup>, Miriam Ragle Aure<sup>3</sup>, Suvi-Katri Leivonen<sup>4</sup>, Mads Haugland Haugen<sup>2</sup>, Vesa Hongisto<sup>5</sup>, Vessela N. Kristensen<sup>3,6</sup>, Gunhild Mari Mælandsmo<sup>2,7</sup>, and Kristine Kleivi Sahlberg<sup>1,2</sup>.

## Addresses

<sup>1</sup>Department of Research and Innovation, Vestre Viken Hospital Trust, Drammen, Norway.

<sup>2</sup>Department of Tumor Biology, Institute for Cancer Research, The Norwegian Radium Hospital, Oslo University Hospital, Oslo, Norway.

<sup>3</sup>Department of Medical Genetics, Institute of Clinical Medicine, Faculty of Medicine, University of Oslo, Oslo, Norway.

<sup>4</sup>Applied Tumor Genomics Research Program, Medical Faculty, University of Helsinki, Helsinki, Finland.

<sup>5</sup>Division of Toxicology, Misvik Biology, Turku, Finland.

<sup>6</sup>Department of Clinical Molecular Biology (EpiGen), Division of Medicine, Akershus University Hospital, Lørenskog, Norway.

<sup>7</sup>Institute for Medical Biology, Faculty of Health Sciences, UiT – The Arctic University of Norway.

## Correspondence

Dr. K. K. Sahlberg,

Department of Research and Innovation, Vestre Viken Hospital Trust, P.O. Box 800, 3004 Drammen, Norway.

E-mail: Kristine.Sahlberg@vestreviken.no

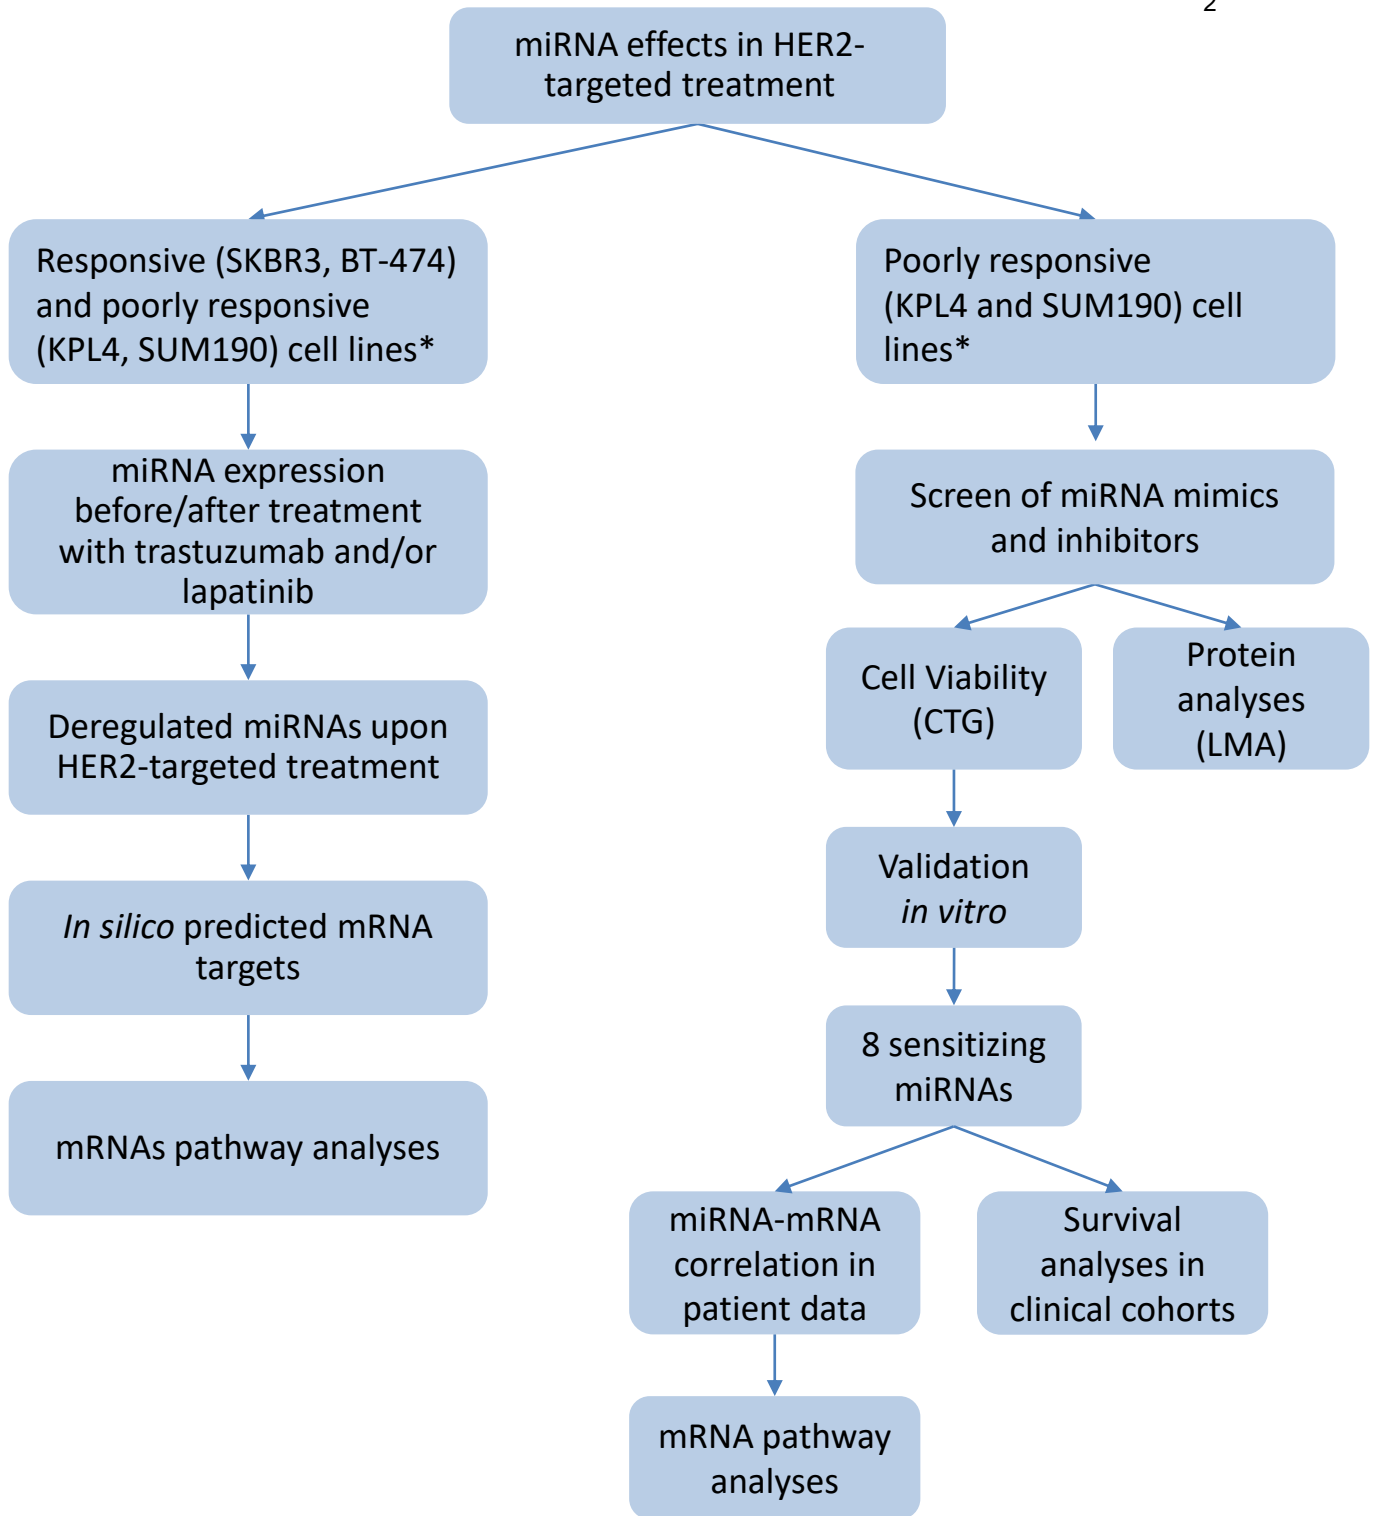

\*Response to targeted treatment (trastuzumab and lapatinib).  
CTG = CellTiter-Glo. LMA = Protein Lysate Microarray

**Supplementary Figure S1: Flowchart illustrating the main topics covered in the paper.**

On the left side, the effects of HER2-targeted treatment on endogenous miRNA expression levels in HER2+ breast cancer cells are studied. On the right side, the effects of combinatorial treatment with HER2-targeted drugs and transfection of miRNAs in poorly responsive cell lines are explored.

## Supplementary Figure S2: miRNA expression before and after targeted treatment in four cell lines (SKBR3, BT-474, KPL4, SUM190PT)

**a**

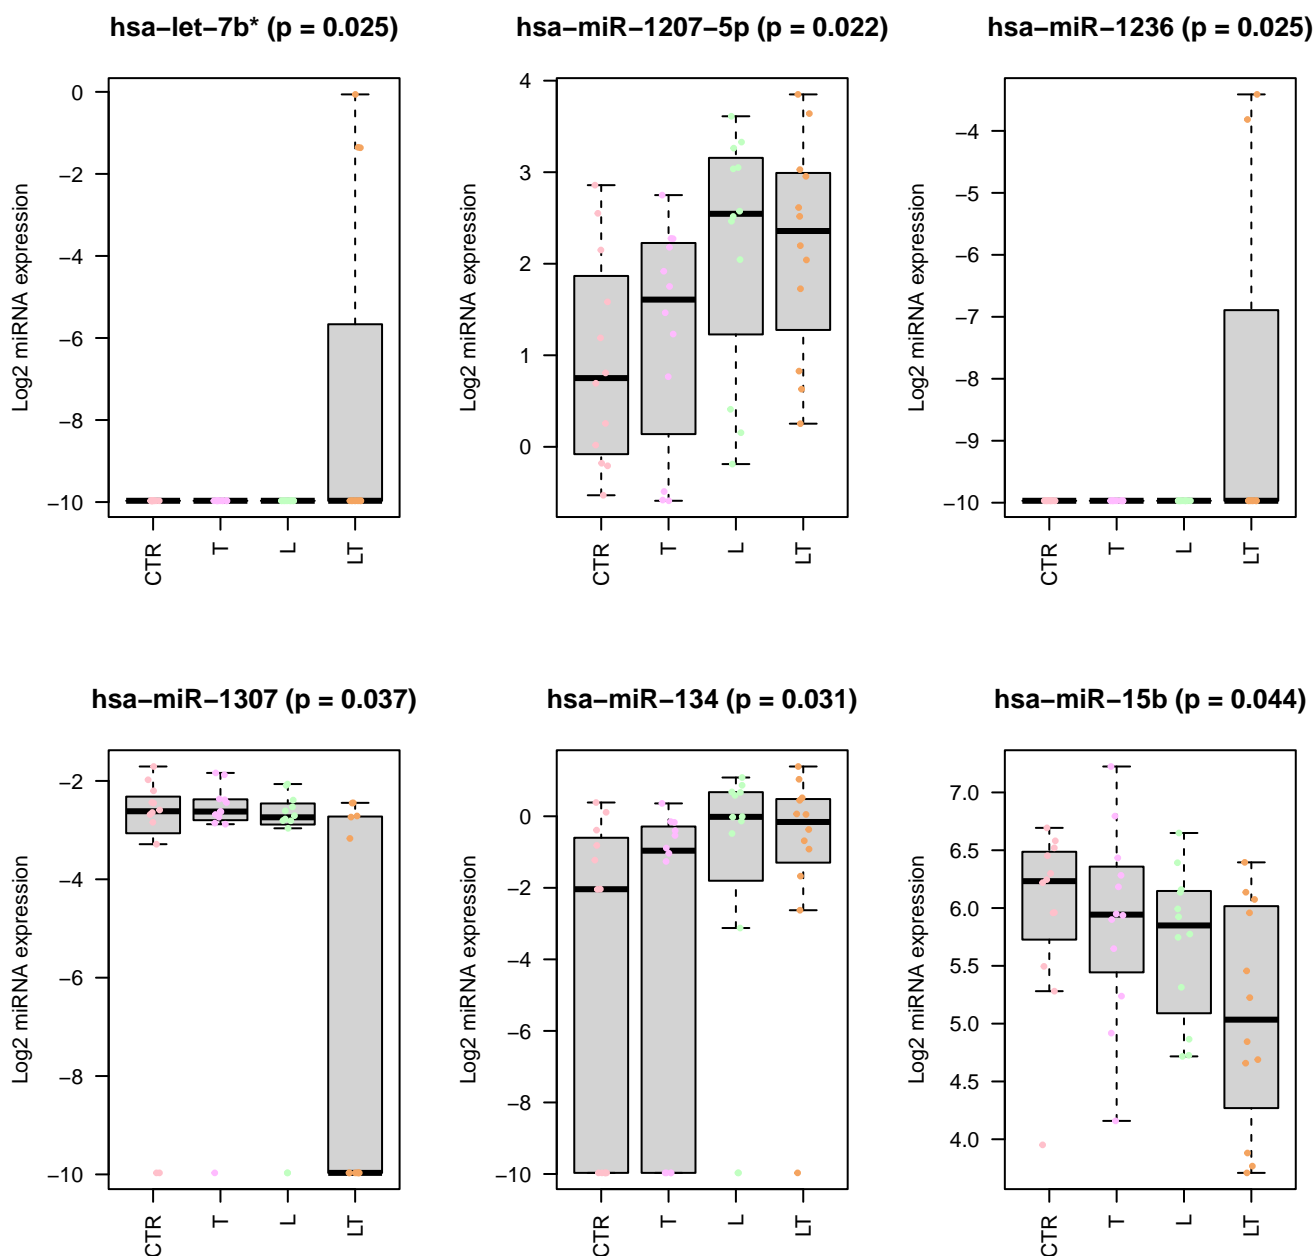

### Supplementary Figure S2: miRNA expression after targeted treatment.

The cells were treated with trastuzumab (10 µg/mL) or lapatinib (100 nM) alone and in combination for 24 hours before total RNA was extracted, and miRNA levels were measured using a one-color microarray Human miRNA Microarray Kit and scanned on Agilent Scanner G2565B. miRNAs with significant (Kruskal-Wallis test p-value < 0.05) expression regulations between any treatment groups are presented. The plots are presented for a-b: four HER2+ cell lines pooled together (SKBR3, BT-474, KPL4, SUM190PT); c-h: cell lines responsive to trastuzumab and lapatinib (SKBR3 and BT-474); and i: poorly responsive cell lines (KPL4 and SUM190PT). T = trastuzumab, L = lapatinib, TL = trastuzumab and lapatinib.

Supplementary Figure S2: miRNA expression before and after targeted treatment in four cell lines (SKBR3, BT-474, KPL4, SUM190PT)

**b**

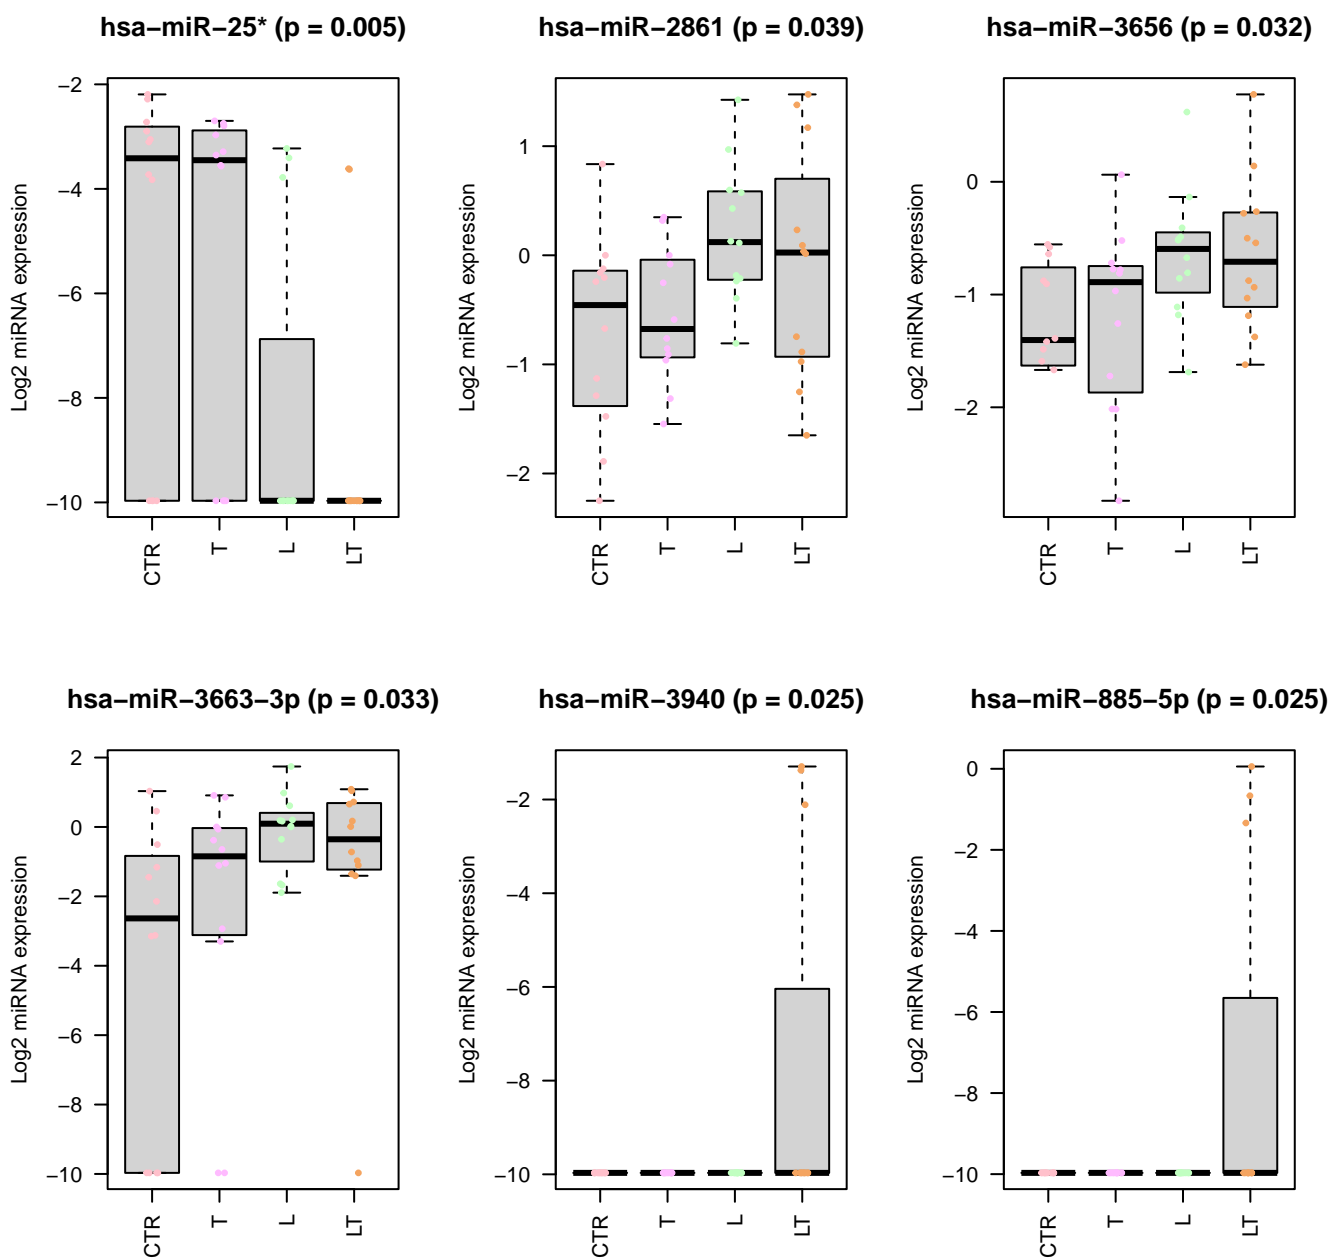

## Supplementary Figure S2: miRNA expression before and after targeted treatment in responsive cell lines (SKBR3, BT-474)

c

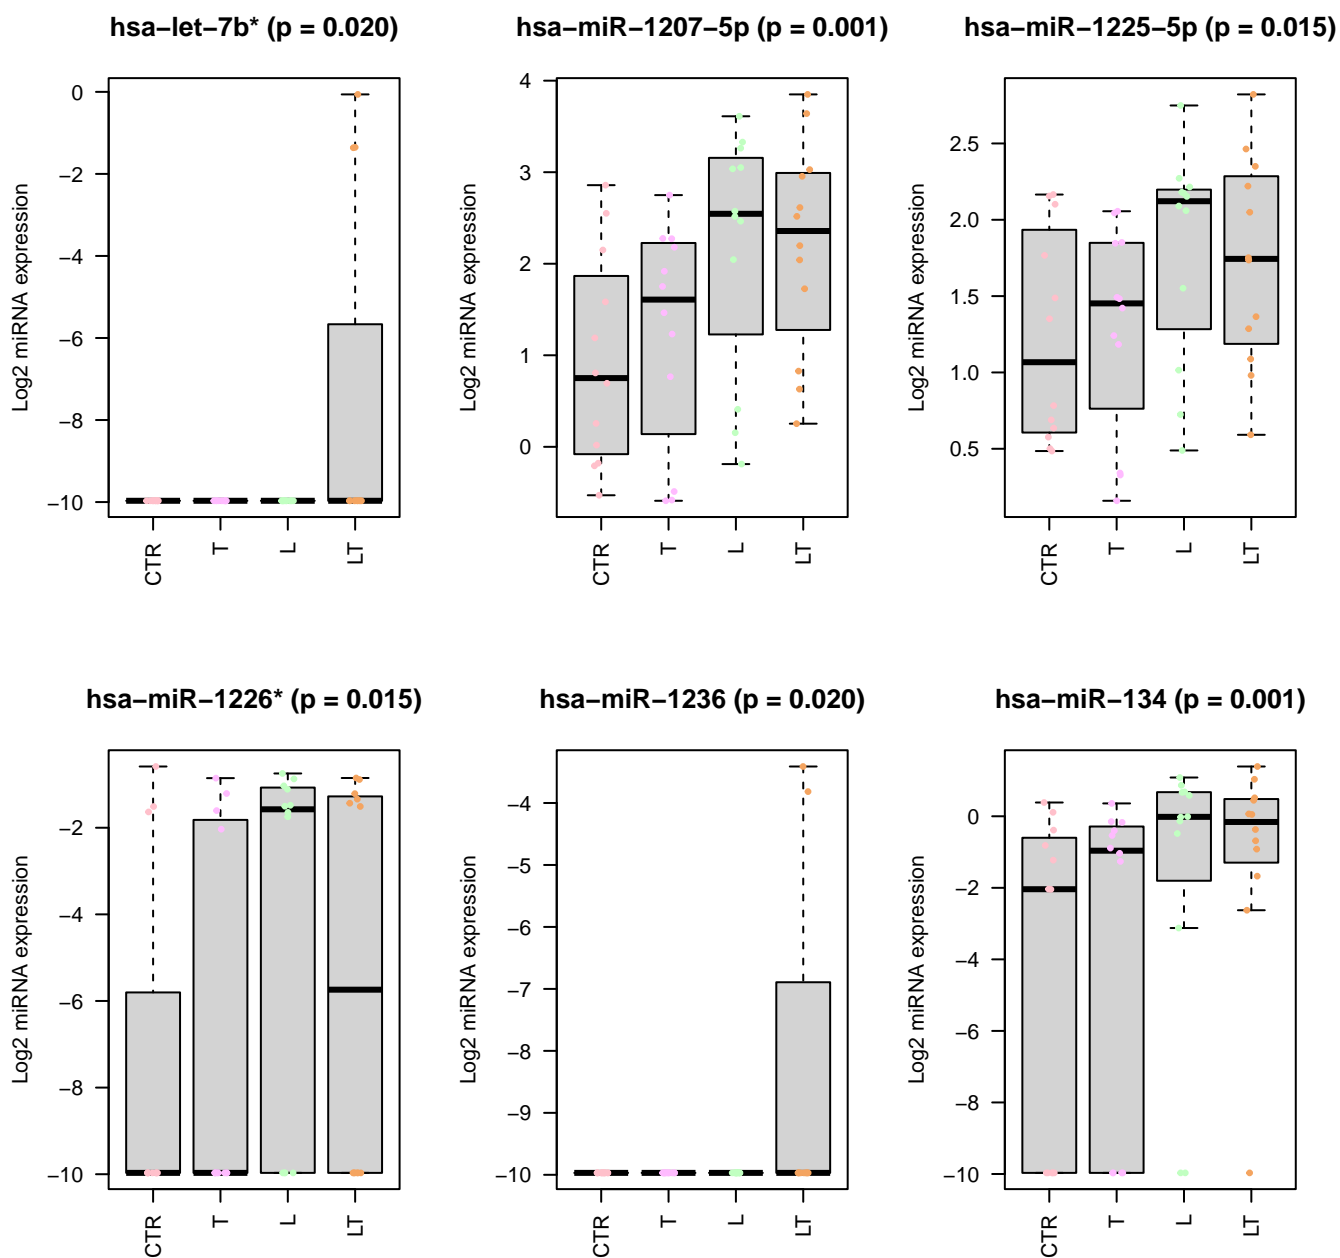

## Supplementary Figure S2: miRNA expression before and after targeted treatment in responsive cell lines (SKBR3, BT-474)

d

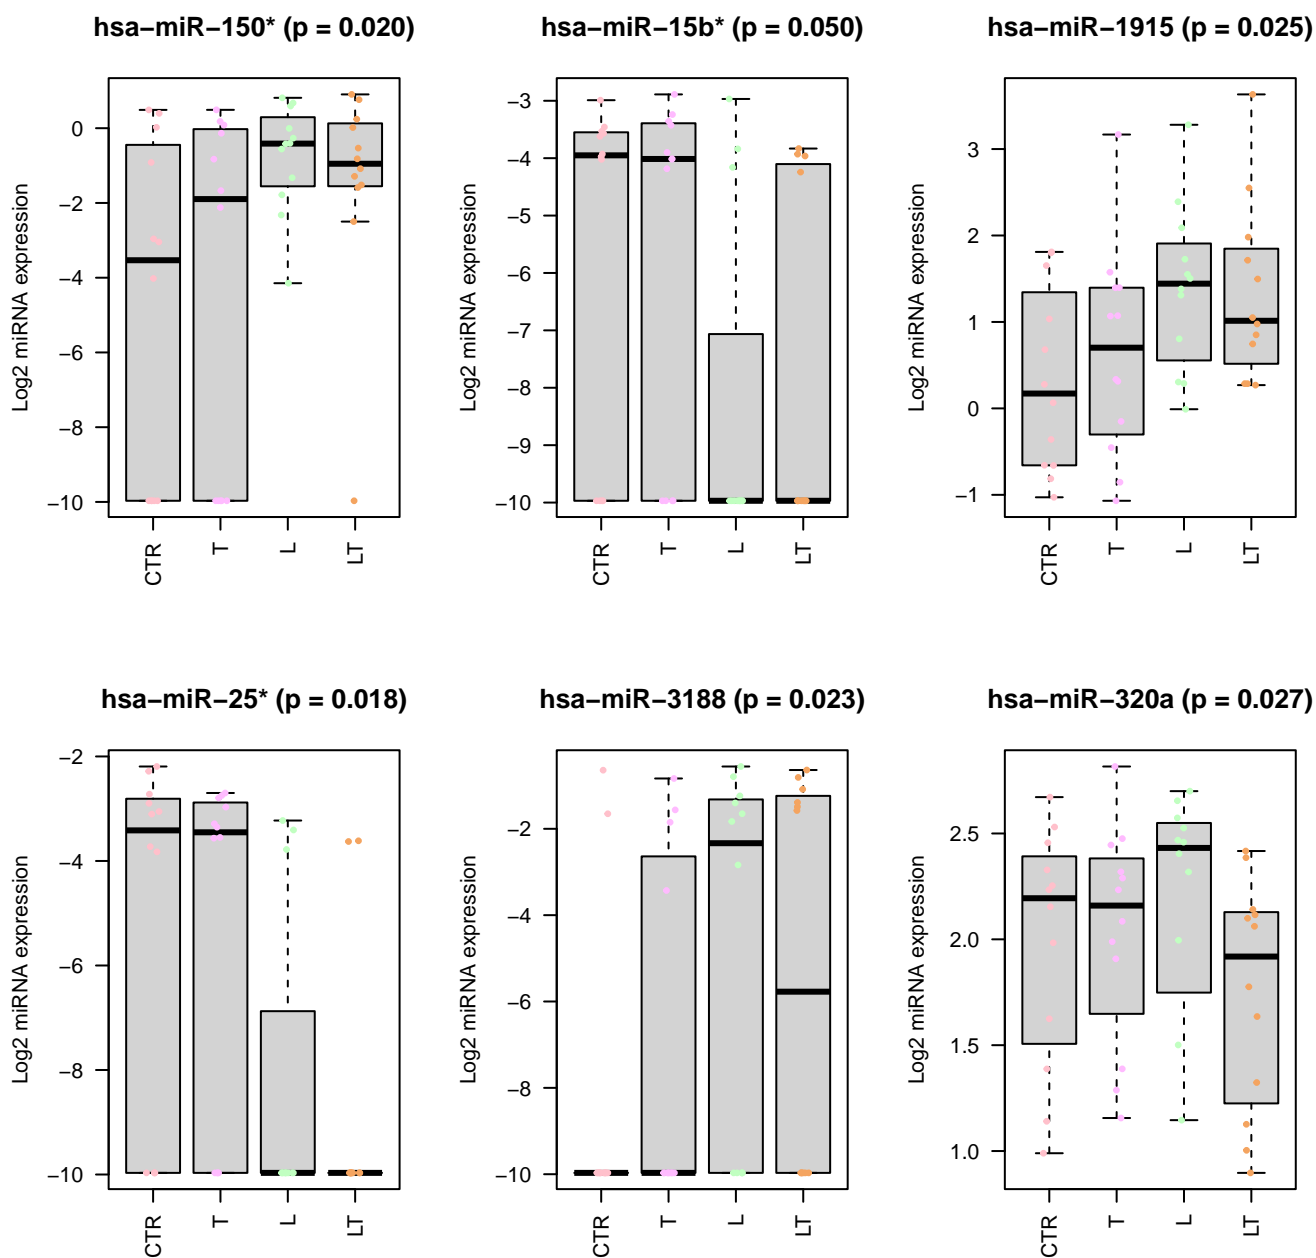

Supplementary Figure S2: miRNA expression before and after targeted treatment in responsive cell lines (SKBR3, BT-474)

**e**

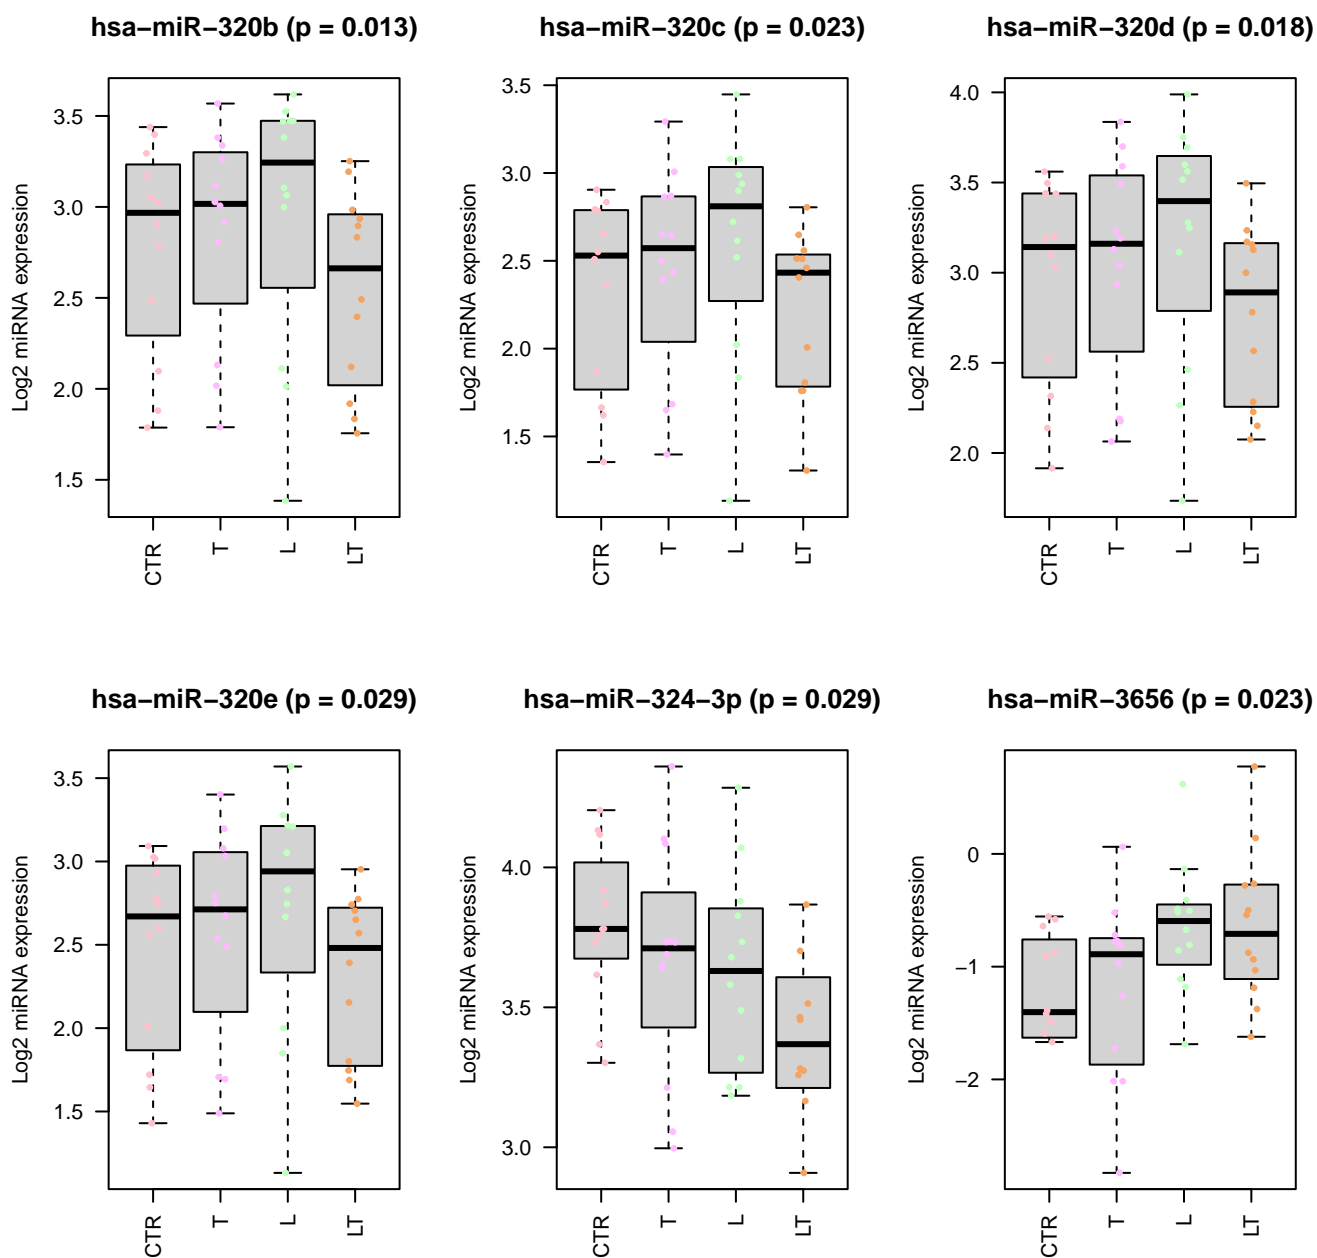

## Supplementary Figure S2: miRNA expression before and after targeted treatment in responsive cell lines (SKBR3, BT-474)

f

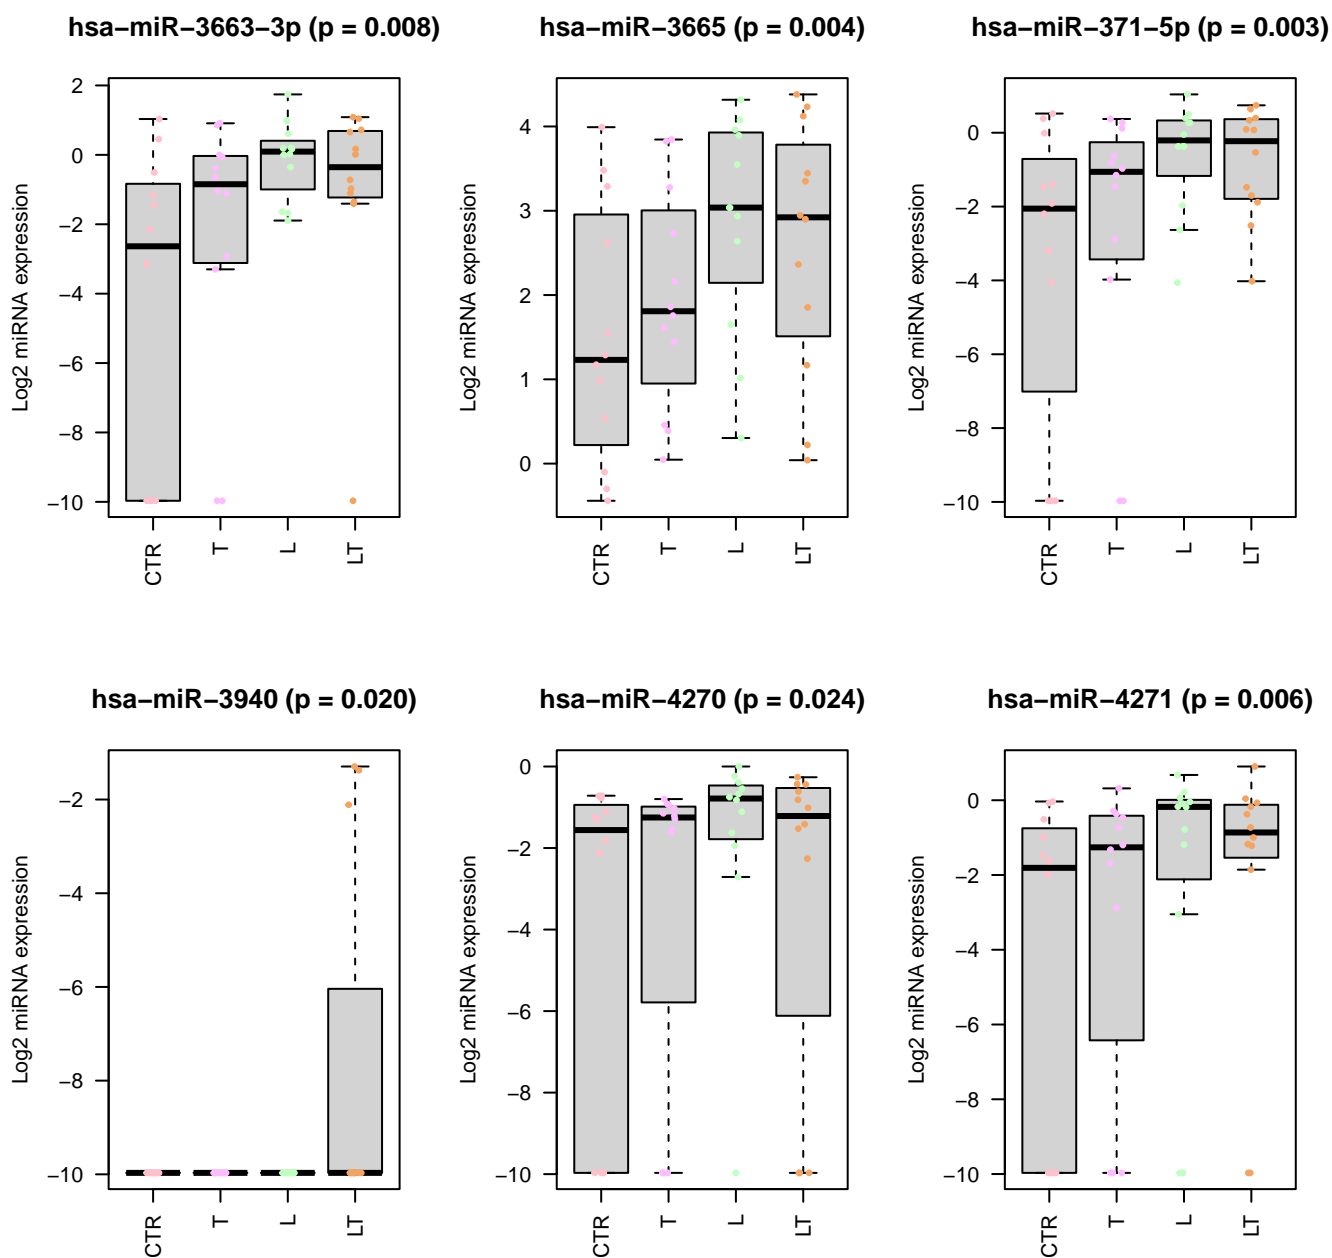



## Supplementary Figure S2: miRNA expression before and after targeted treatment in responsive cell lines (SKBR3, BT-474)

g

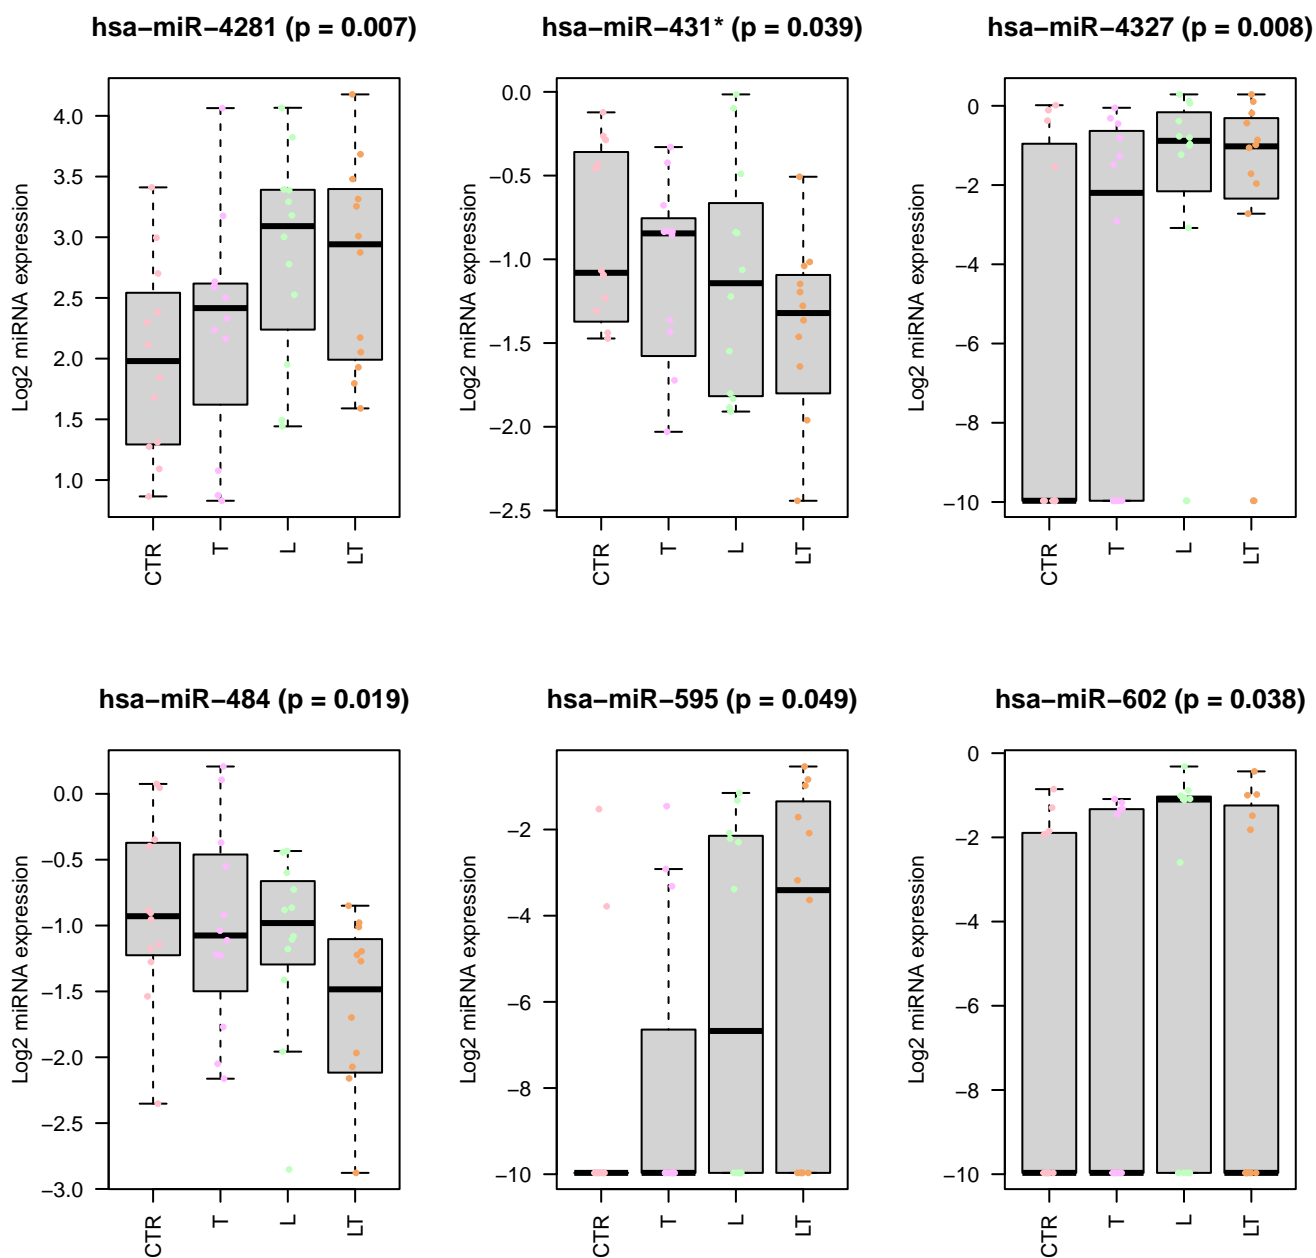

## Supplementary Figure S2: miRNA expression before and after targeted treatment in responsive cell lines (SKBR3, BT-474)

h

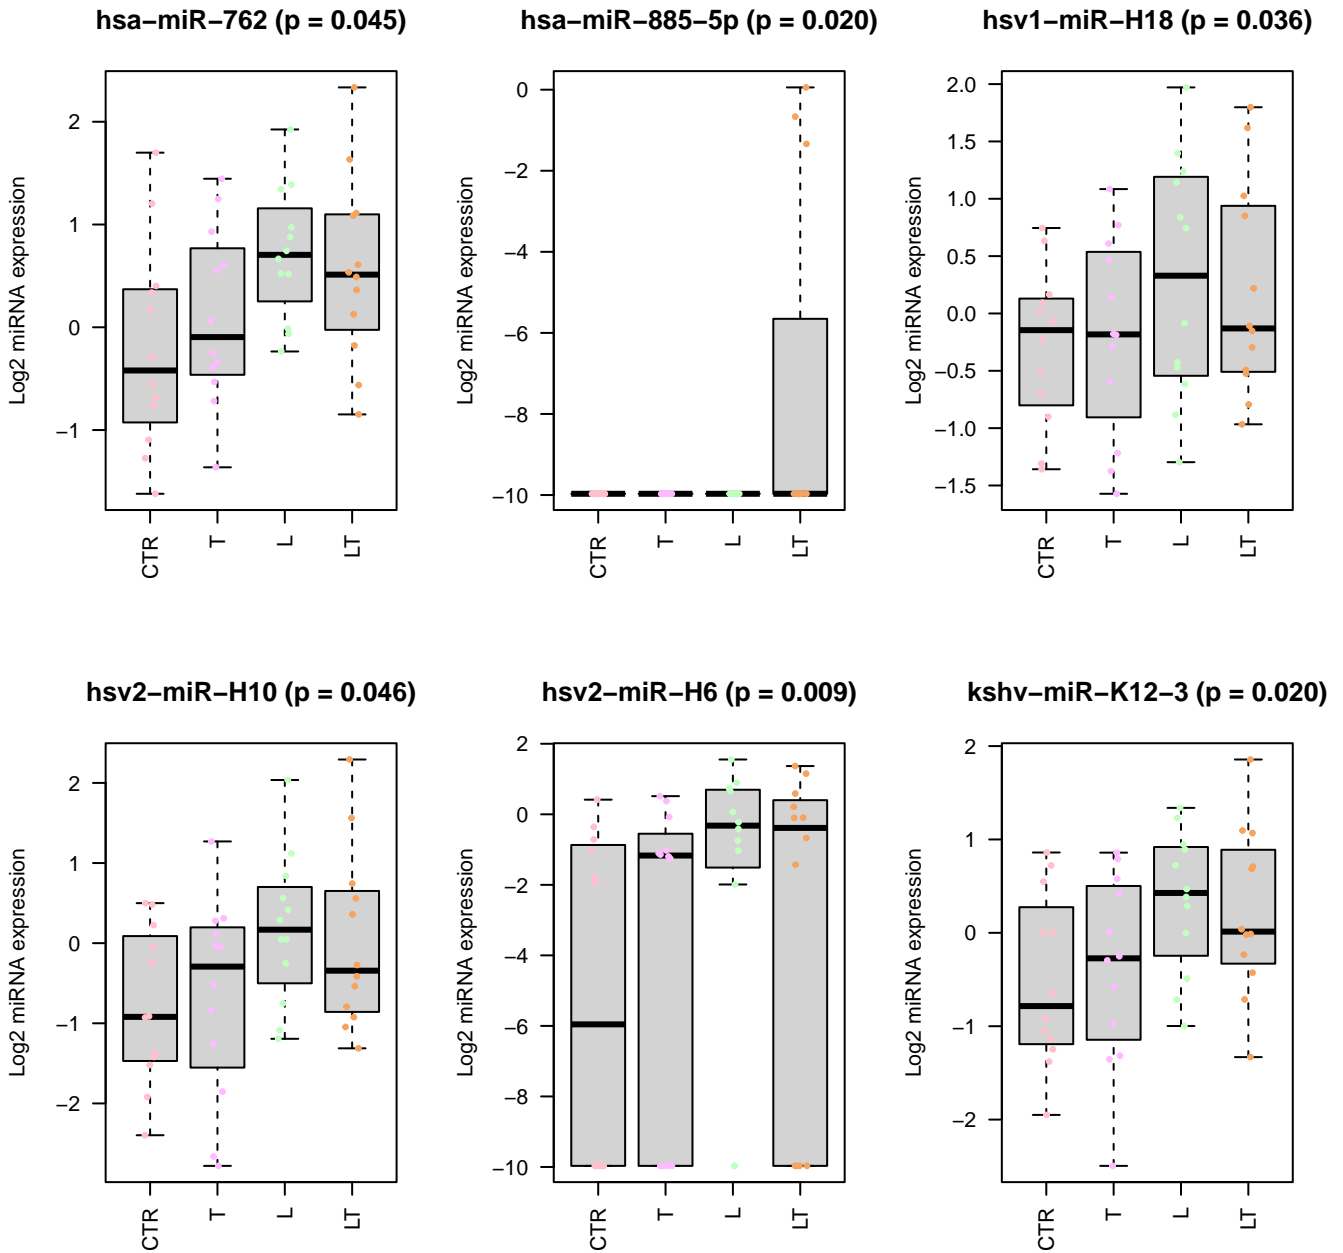

Supplementary Figure S2: miRNA expression before and after targeted treatment in poorly responsive cell lines (KPL4, SUM190PT)

**i**

**hsa-miR-1268 (p=0.020)**

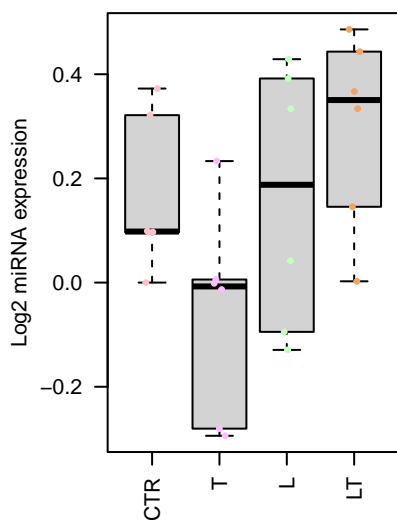

## Supplementary Figure S3

a

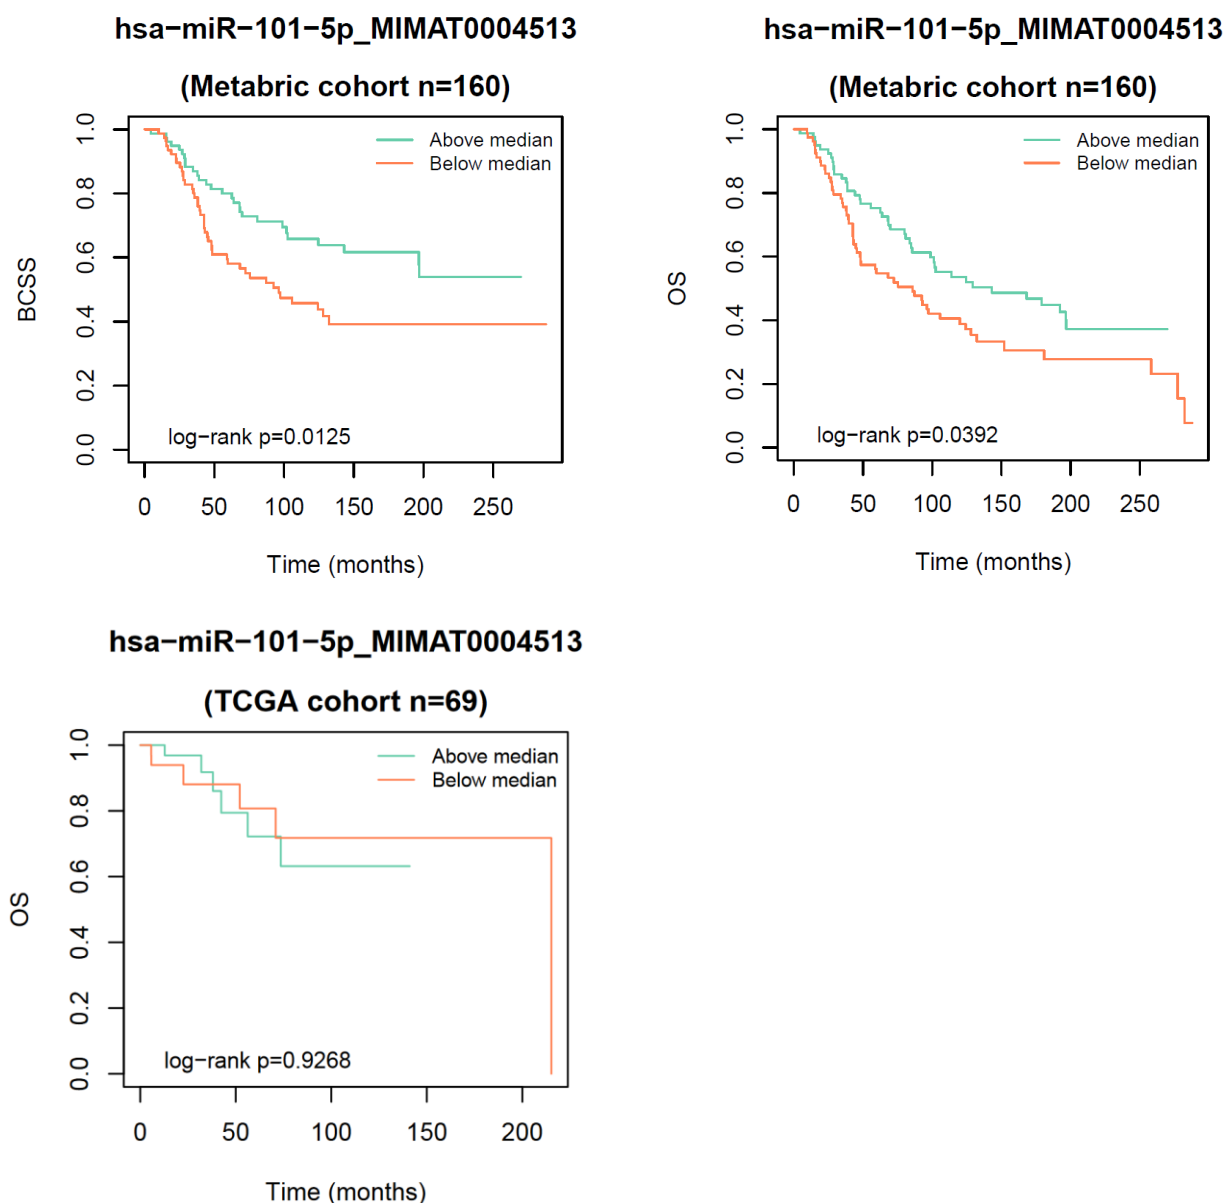

### Supplementary Figure S3: The clinical significance of sensitizing miRNAs in breast cancer patients.

The survival curves are prepared for HER2+ breast cancer patients in the METABRIC ( $n = 160$ ) and the TCGA ( $n = 69$ ) datasets. For the METABRIC data, breast cancer specific survival (BCSS) and overall survival (OS) of four miRNAs are presented (miR-101-5p (a), miR-29a-3p (b), miR29c-3p (c) and miR-744-3p (d)). For the TCGA data, OS for five miRNAs are presented (miR-101-5p (a), miR-29a-3p (b), miR29c-3p (c), miR-744-3p (d) and mir-106a-5p (e)). Log-rank  $p$ -values are significant ( $p < 0.05$ ) only for miR-101-5p in the METABRIC dataset.

## Supplementary Figure S3

b

hsa-miR-29a-3p\_MIMAT0000086

(Metabric cohort n=160)

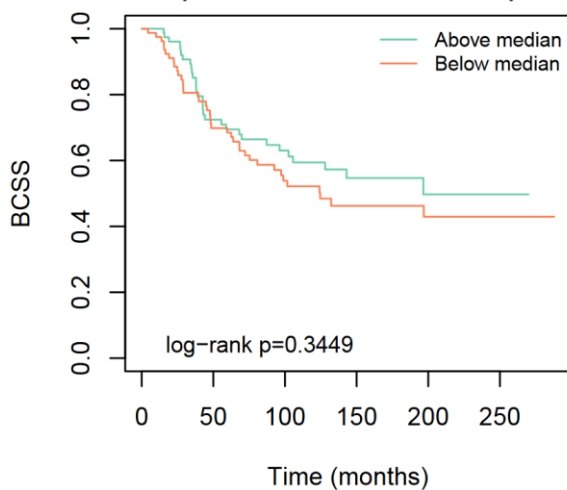

hsa-miR-29a-3p\_MIMAT0000086

(Metabric cohort n=160)

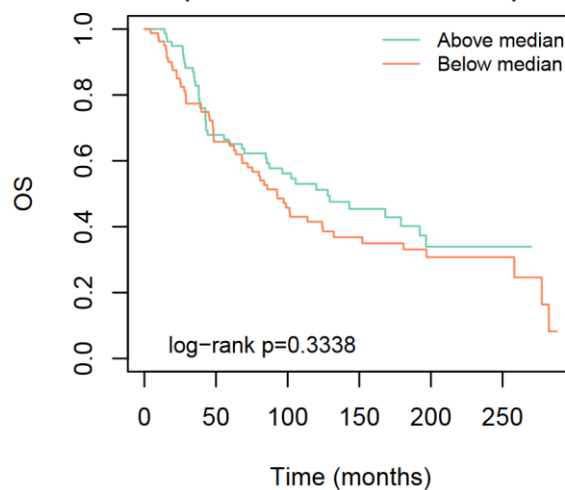

hsa-miR-29a-3p\_MIMAT0000086

(TCGA cohort n=69)

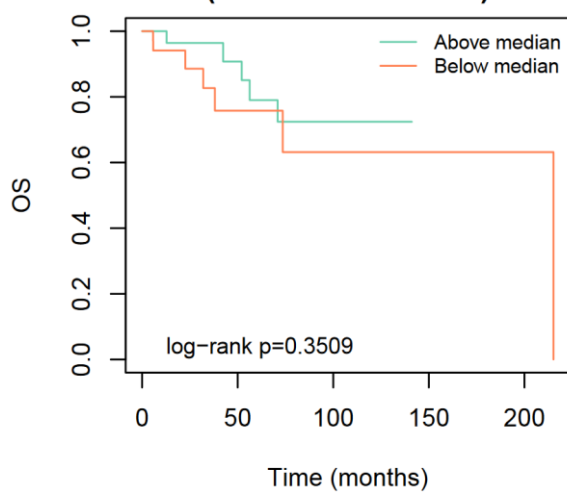

## Supplementary Figure S3

C

hsa-miR-29c-3p\_MIMAT0000681

(Metabric cohort n=160)

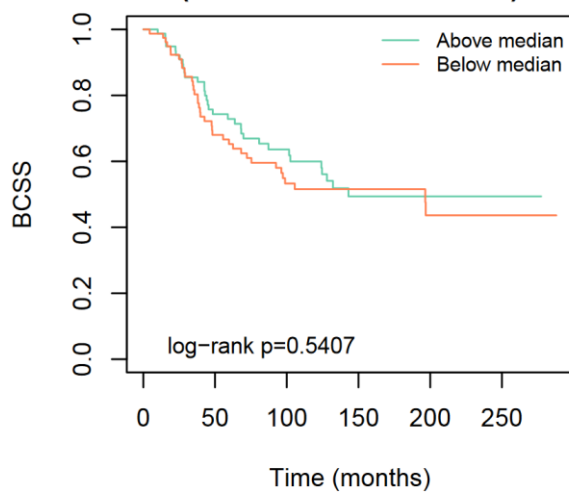

hsa-miR-29c-3p\_MIMAT0000681

(Metabric cohort n=160)

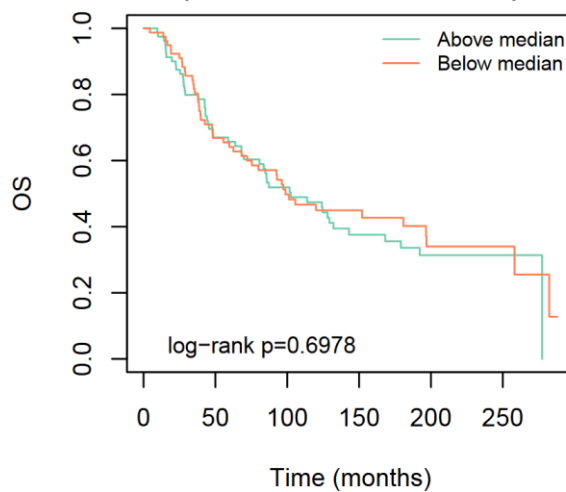

hsa-miR-29c-3p\_MIMAT0000681

(TCGA cohort n=69)

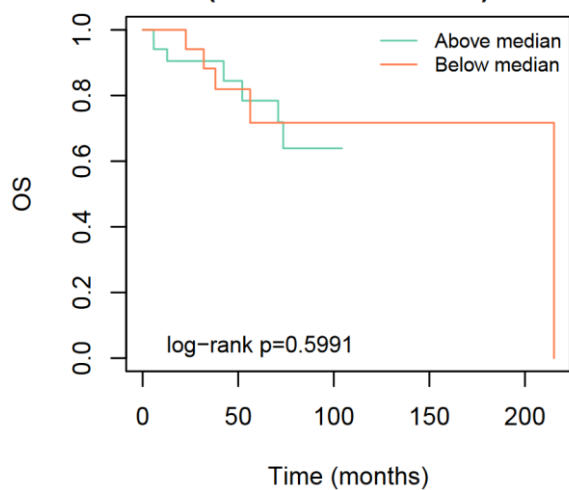

## Supplementary Figure S3

d

hsa-miR-744-3p\_MIMAT0004946

(Metabric cohort n=160)

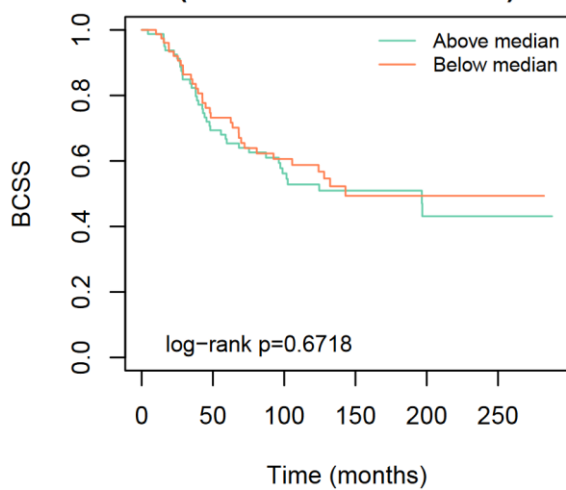

hsa-miR-744-3p\_MIMAT0004946

(Metabric cohort n=160)

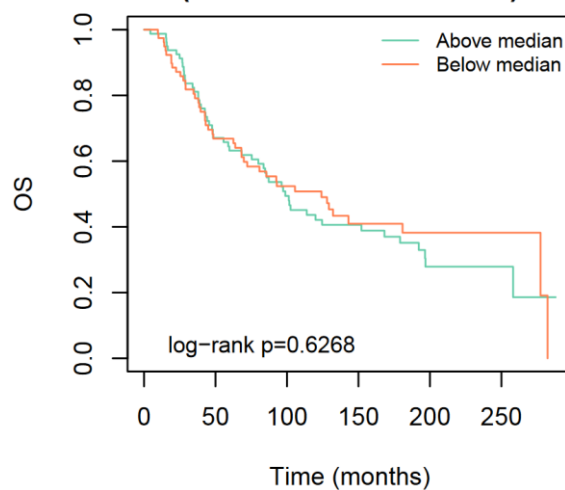

hsa-miR-744-3p\_MIMAT0004946

(TCGA cohort n=69)

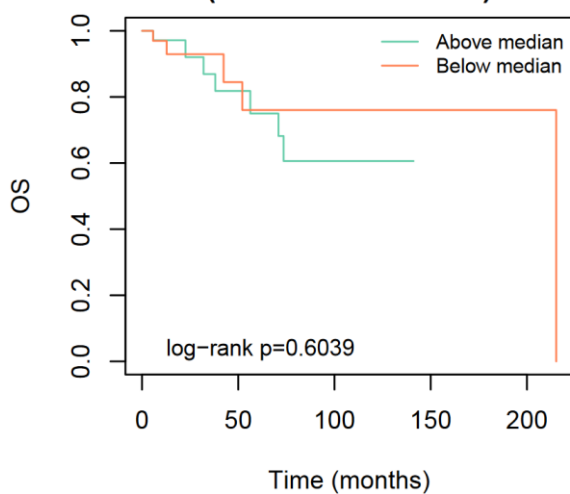

## Supplementary Figure S3

e

hsa-miR-106a-5p\_MIMAT0000103

(TCGA cohort n=69)

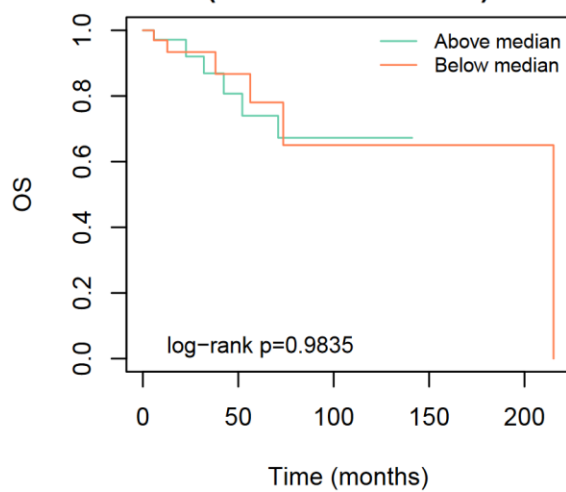

Supplement: 41598_2021_90385_MOESM2_ESM.pdf [file 41598_2021_90385_MOESM2_ESM.pdf]
